# Supplementary material for: Versatile Roles of Aquaporins in Plant Growth and Development
Source: PubMed Central journal article supplement (PMC7763978; doi:10.3390/ijms21249485), 2020-12-13
Supplement: ijms-21-09485-s001.pdf [file ijms-21-09485-s001.pdf]

Figure S1 Expression of AQPs during plant growth and development

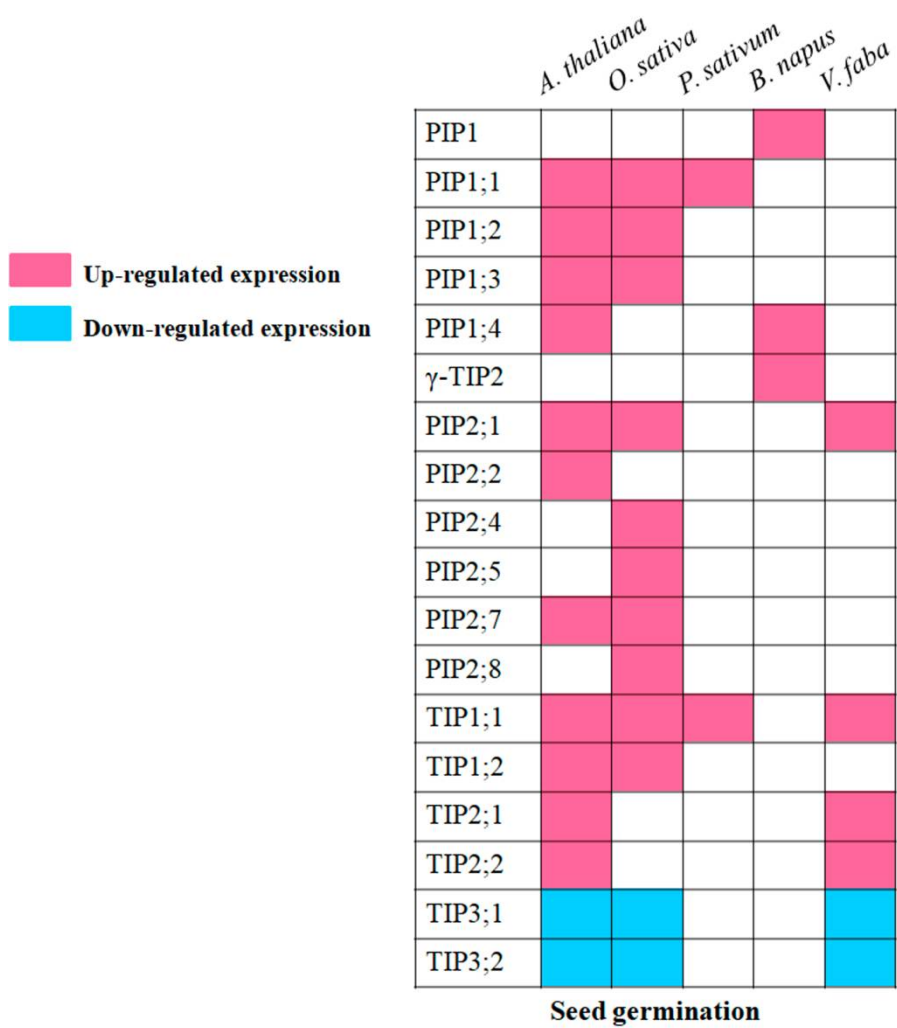

 Up-regulated expression

|        | <i>A. thaliana</i> | <i>O. sativa</i> | <i>P. sativum</i> | <i>L. esculentum</i> | <i>S. chacoense</i> | <i>P. taeda</i> | <i>P. vulgaris</i> |
|--------|--------------------|------------------|-------------------|----------------------|---------------------|-----------------|--------------------|
| PIP1;1 |                    |                  |                   |                      |                     |                 |                    |
| PIP1;2 |                    |                  |                   |                      |                     |                 |                    |
| PIP1;3 |                    |                  |                   |                      |                     |                 |                    |
| PIP1;4 |                    |                  |                   |                      |                     |                 |                    |
| PIP1;5 |                    |                  |                   |                      |                     |                 |                    |
| PIP2;1 |                    |                  |                   |                      |                     |                 |                    |
| PIP2;2 |                    |                  |                   |                      |                     |                 |                    |
| PIP2;3 |                    |                  |                   |                      |                     |                 |                    |
| PIP2;5 |                    |                  |                   |                      |                     |                 |                    |
| PIP2;6 |                    |                  |                   |                      |                     |                 |                    |
| PIP2;7 |                    |                  |                   |                      |                     |                 |                    |
| PIP2;8 |                    |                  |                   |                      |                     |                 |                    |
| TIP1;1 |                    |                  |                   |                      |                     |                 |                    |
| TIP2;2 |                    |                  |                   |                      |                     |                 |                    |
| TIP3;1 |                    |                  |                   |                      |                     |                 |                    |
| TIP4;2 |                    |                  |                   |                      |                     |                 |                    |
| NIP1;1 |                    |                  |                   |                      |                     |                 |                    |
| SIP1;1 |                    |                  |                   |                      |                     |                 |                    |
| SIP1;2 |                    |                  |                   |                      |                     |                 |                    |
| SIP2;1 |                    |                  |                   |                      |                     |                 |                    |

**Seed development**

 Up-regulated expression

|        | <i>A. thaliana</i> | <i>Z. mays</i> | <i>H. vulgare</i> | <i>V. vinifera</i> | <i>V. faba</i> |
|--------|--------------------|----------------|-------------------|--------------------|----------------|
| PIP1;1 | ■                  | ■              |                   | ■                  |                |
| PIP1;2 | ■                  | ■              | ■                 | ■                  |                |
| PIP1;3 | ■                  |                |                   | ■                  |                |
| PIP1;4 |                    |                |                   | ■                  |                |
| PIP1;5 |                    | ■              |                   | ■                  |                |
| PIP2;1 | ■                  | ■              |                   | ■                  |                |
| PIP2;2 |                    |                | ■                 | ■                  |                |
| PIP2;3 | ■                  |                |                   | ■                  |                |
| PIP2;4 |                    | ■              |                   | ■                  |                |
| PIP2;5 |                    | ■              | ■                 |                    |                |
| PIP2;6 | ■                  | ■              |                   |                    |                |
| TIP1;1 |                    | ■              | ■                 |                    |                |
| TIP2;1 |                    |                |                   |                    | ■              |
| TIP2;2 |                    |                |                   |                    | ■              |
| TIP2;3 |                    |                | ■                 |                    |                |

**Roots**

|        | <i>A. thaliana</i> | <i>R. communis</i> | <i>P. sativum</i> | <i>S. viridis</i> | <i>O. sativa</i> |
|--------|--------------------|--------------------|-------------------|-------------------|------------------|
| PIP1;1 |                    | ■                  | ■                 |                   | ■                |
| PIP1;2 |                    |                    |                   |                   | ■                |
| PIP2;1 |                    | ■                  | ■                 | ■                 | ■                |
| PIP2;6 |                    |                    |                   |                   | ■                |
| TIP1;1 | ■                  | ■                  | ■                 |                   | ■                |
| TIP2;2 |                    |                    |                   |                   | ■                |
| SIP1;1 |                    |                    |                   |                   | ■                |

**Hypocotyls    Shoots    Internodes**

 Up-regulated expression

|        | <i>A. thaliana</i>                                                                   | <i>Z. mays</i>                                                                        | <i>H. vulgare</i>                                                                     |
|--------|--------------------------------------------------------------------------------------|---------------------------------------------------------------------------------------|---------------------------------------------------------------------------------------|
| PIP1;1 |                                                                                      |    |    |
| PIP1;2 |                                                                                      |    |                                                                                       |
| PIP1;3 |                                                                                      |    |                                                                                       |
| PIP1;4 |                                                                                      |    |                                                                                       |
| PIP1;5 |                                                                                      |    |    |
| PIP1;6 |                                                                                      |    |                                                                                       |
| PIP2;1 |                                                                                      |    |                                                                                       |
| PIP2;2 |                                                                                      |    |    |
| PIP2;3 |                                                                                      |    |                                                                                       |
| PIP2;4 |                                                                                      |   |                                                                                       |
| PIP2;5 |                                                                                      |  |  |
| PIP2;6 |                                                                                      |  |                                                                                       |
| TIP1;1 |  |                                                                                       |  |
| TIP2;3 |                                                                                      |                                                                                       |  |
| NIP1;1 |                                                                                      |                                                                                       |  |

**Leaves**

 Up-regulated expression

|               | <i>P. persica</i>                                                                 | <i>C. sinensis</i>                                                                   | <i>D. caryophyllus</i>                                                                |
|---------------|-----------------------------------------------------------------------------------|--------------------------------------------------------------------------------------|---------------------------------------------------------------------------------------|
| PIP1;1        |                                                                                   |                                                                                      |    |
| PIP1;3        |                                                                                   |                                                                                      |    |
| PIP2          |  |                                                                                      |                                                                                       |
| PIP2;1        |                                                                                   |                                                                                      |    |
| PIP2;2        |                                                                                   |                                                                                      |    |
| PIP2;4        |                                                                                   |    |                                                                                       |
| PIP2;5        |                                                                                   |    |    |
| $\delta$ TIP1 |  |                                                                                      |                                                                                       |
| TIP1;4        |                                                                                   |    |    |
| TIP2;2        |                                                                                   |                                                                                      |    |
| TIP4;1        |                                                                                   |                                                                                      |   |
| NIP6;1        |                                                                                   |                                                                                      |  |
| SIP1;1        |                                                                                   |                                                                                      |  |
| SIP2;1        |                                                                                   |  |                                                                                       |
| XIP           |                                                                                   |  |                                                                                       |

**Dormant buds**
**Active buds**

|        | <i>O. sativa</i>                                                                    | <i>N. tabacum</i>                                                                   |
|--------|-------------------------------------------------------------------------------------|-------------------------------------------------------------------------------------|
| PIP1   |                                                                                     |  |
| PIP1;1 |  |                                                                                     |
| PIP2   |                                                                                     |  |
| PIP4;1 |  |                                                                                     |

**Anthers**

 Up-regulated expression

|         | <i>V. vinifera</i> | <i>C. lanatus</i> | <i>L. esculentum</i> | <i>Fragaria</i> | <i>M. domestica</i> | <i>S. lycopersicum</i> | Banana |
|---------|--------------------|-------------------|----------------------|-----------------|---------------------|------------------------|--------|
| PIP1a   |                    |                   |                      |                 | ■                   |                        |        |
| PIP1b   |                    |                   |                      |                 | ■                   |                        |        |
| PIP1;1  |                    |                   | ■                    | ■               |                     | ■                      |        |
| PIP1;2  | ■                  | ■                 |                      |                 |                     | ■                      |        |
| PIP1;3  | ■                  | ■                 |                      |                 | ■                   |                        |        |
| PIP1;4  |                    |                   | ■                    |                 |                     |                        |        |
| PIP1;5  |                    |                   | ■                    |                 |                     |                        |        |
| PIP1;6  |                    |                   |                      |                 |                     |                        | ■      |
| PIP1;7  |                    |                   |                      |                 |                     | ■                      |        |
| PIP2;1  | ■                  |                   |                      | ■               |                     |                        |        |
| PIP2;3  | ■                  |                   |                      |                 |                     |                        |        |
| PIP2;5  | ■                  |                   |                      |                 |                     |                        | ■      |
| PIP2;6  |                    |                   |                      |                 |                     |                        |        |
| PIP2;7  |                    |                   |                      |                 |                     |                        | ■      |
| PIP2;10 |                    |                   |                      |                 |                     |                        | ■      |
| TIP1;2  | ■                  |                   |                      |                 |                     |                        |        |
| TIP1;3  | ■                  |                   |                      |                 |                     |                        |        |
| TIP2;1  | ■                  |                   |                      |                 |                     |                        |        |
| TIP3;1  |                    |                   |                      |                 |                     | ■                      |        |
| TIP3;2  |                    |                   |                      |                 |                     | ■                      |        |
| TIP4;1  |                    |                   |                      |                 |                     |                        | ■      |
| NIP2;1  |                    |                   |                      |                 |                     | ■                      |        |
| NIP4;1  |                    |                   |                      |                 |                     | ■                      |        |
| NIP5;1  |                    |                   |                      |                 |                     | ■                      |        |
| NIP6;1  |                    |                   |                      |                 |                     | ■                      |        |
| SIP1;1  |                    |                   |                      |                 |                     |                        | ■      |
| SIP2;1  |                    |                   |                      |                 |                     | ■                      |        |
| XIP1;1  |                    |                   |                      |                 |                     | ■                      |        |

**Fruits**
